# Supplementary material for: Peritumoral administration of DRibbles-pulsed antigen-presenting cells enhances the antitumor efficacy of anti-GITR and anti-PD-1 antibodies via an antigen presenting independent mechanism
Source: PubMed Central journal article supplement (PMC6865022; doi:10.1186/s40425-019-0786-7), 2019-11-20
Supplement: 40425_2019_786_MOESM1_ESM.pdf [file 40425_2019_786_MOESM1_ESM.pdf]

1 **Additional File 1**

2 **Supplementary Materials and Methods:**

3 **Preparation of DRibbles-pulsed cells:**

4 DRibbles concentration was assessed using the BCA Protein Assay (Thermo Scientific)  
5 kit. To generate DRibbles-pulsed BMCs or DRibbles-pulsed DCs,  $5 \times 10^6$  cells/ml were cultured  
6 with 30  $\mu\text{g/ml}$  DRibbles for 4.5 hr at  $37^\circ\text{C}$  in a 50-ml conicle. Cells were then washed with PBS  
7 before use. To assess cell location after peritumoral injections, DR-pulsed BMCs/DCs were  
8 stained with PKH67 Green (Sigma) or CellVue Claret Far Red fluorescent dye (Sigma)  
9 according to manufacture instructions beforehand. Briefly, a mixture of 1 ml of Diluent C and 4  
10  $\mu\text{L}$  dye were added to  $2 \times 10^7$  cells resuspended in 1 ml of Diluent C for 4 min before quenching  
11 with FBS. Cells were washed 3x with media followed by PBS before injecting.

12

13 **Tumor challenge and treatment:** To deplete CD8+ and CD4+ cells, 100  $\mu\text{g}$  anti-CD8 Ab and  
14 200  $\mu\text{g}$  anti-CD4 Ab were administered i.p. respectively, on day 4. Anti-CD4 and anti-CD8  
15 antibodies led to over 99.5% depletion of respective T cells from mouse spleens after 24 h of  
16 administration. FTY720 (Cayman Chemical Company) was dissolved in DMSO to 20 mg/ml,  
17 aliquoted and stored at  $-20^\circ\text{C}$ . Daily, an FTY720 aliquot was diluted in PBS to 200  $\mu\text{g/ml}$  before  
18 injecting 100  $\mu\text{l}$  i.p.

19

20 **Intracellular flow cytometry staining:** Cells were incubated with bovine IgG to block Fc  
21 receptors at  $4^\circ\text{C}$  for 30 min before surface staining. Cells were fixed and permeabilized using  
22 Foxp3/transcription factor staining buffer kit (eBioscience) overnight at  $4^\circ\text{C}$  or for 30 min at

23 room temperature, and then washed and stained intracellularly in permeabilization buffer. The  
24 antibodies used for flow cytometry staining are depicted in Supplementary Table S1.

25 To study *in situ* cytokine production, 5 h before mice were euthanized, 250 µg brefeldin  
26 A (BFA; Thermo Fisher Scientific) was injected intravenously (i.v.). Tumors, LNs and spleens  
27 were harvested and dissociated in the presence of 10 µg/ml BFA. Flow cytometry staining  
28 occurred in the presence of BFA until cells were fixed and permeabilized.

29

### 30 **TCR Sequencing**

31 Line-1 tumors were harvested 6 days post p.t. DR-BMC injections. The DNeasy blood  
32 and tissue kit (Qiagen) was used to extract total genomic DNA. The Mouse ImmunoSEQ kit  
33 from Adaptive Biotechnologies was used for survey sequencing of the TCRβ chain.

34

35

36

37

38

39

40

41

42

43

44

45

46 **Supplementary Table S1:** List of antibodies used for flow cytometry analysis.

| <b>Antibody</b>                          | <b>Company</b>           | <b>Catolog Number</b> |
|------------------------------------------|--------------------------|-----------------------|
| Fixable Viability Stain 700              | BD Biosciences           | 564997                |
| BV711-labeled anti-CD45                  | BD Biosciences           | 563709                |
| APC-Cy7-labeled anti-CD45                | BD Biosciences           | 557659                |
| BV510-labeled anti-CD3e                  | BD Biosciences           | 563024                |
| BV786-labeled anti-CD8a                  | BD Biosciences           | 563332                |
| BV605-labeled anti-CD4                   | BD Biosciences           | 563151                |
| APC-labeled AH1 Tetramer                 | MBL International        | TB-M521-2             |
| PE-labeled anti-pSIY                     | ProImmune                | F2B-D                 |
| BV650-labeled anti-Tbet                  | BD Biosciences           | 564142                |
| PE-labeled anti-FoxP3                    | eBioscience              | 12-5773-82            |
| PE-Cy7-labeled anti-Ki-67                | Thermo Fisher Scientific | 25-5698-80            |
| APC-labeled anti-Granzyme A              | eBioscience              | 17-5831-82            |
| PerCP-eFl710-labeled anti-CD107a         | eBioscience              | 46-1071-82            |
| PE-labeled anti-Granzyme B               | Thermo Fisher Scientific | MHGB04                |
| PE-labeled anti-IFN- $\gamma$            | BD Biosciences           | 554412                |
| BV421-labeled anti-IFN- $\gamma$         | BD Biosciences           | 563376                |
| BV510-labeled anti-TNF- $\alpha$         | BD Biosciences           | 563386                |
| AF647-labeled anti-ICOS                  | BD Biosciences           | 563469                |
| PE-labeled anti-CD69                     | BD Biosciences           | 557392                |
| BV421-labeled anti-TIGIT                 | BD Biosciences           | 565270                |
| BV605-labeled anti-I-A/I-E               | BD Biosciences           | 563413                |
| BV786-labeled anti-CD11c                 | BD Biosciences           | 563735                |
| BV480-labeled anti-CD11b                 | BD Biosciences           | 566149                |
| FITC-labeled anti-Ly-6G and Ly-6C (GR-1) | eBioscience              | 553127                |
| BV421-labeled anti-CD103                 | BD Biosciences           | 562771                |
| PE-labeled anti-Clec9a                   | BioLegend                | 143504                |
| PE-eFluor610-labeled anti-F4/80          | Thermo Fisher Scientific | 61-4801-82            |
| FITC-labeled anti-F4/80                  | Thermo Fisher Scientific | 11-4801-82            |
| PerCPeFl710-labeled anti-IRF8            | eBioscience              | 46-9852-82            |
| PE-labeled anti-CCR7                     | eBioscience              | 12-1971-82            |
| BV711-labeled anti-PD-L1                 | BD Biosciences           | 563369                |
| PE-Cy7-labeled anti-CD24                 | Thermo Fisher Scientific | 25-0242-82            |

47

48

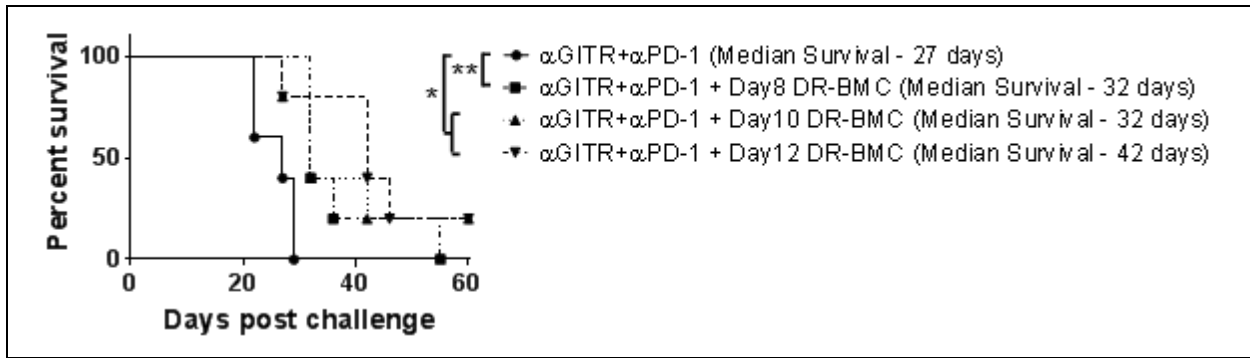

49 **Figure S1. Timing assessment of peritumoral DR-BMC administration.** Line-1-tumor  
 50 bearing mice were treated i.p. with anti-GITR antibody on days 5 and 8 and anti-PD-1 antibody  
 51 on days 10, 12, and 14. DR-pulsed BMCs were peritumorally administered on either day 8, 10  
 52 or 12. Overall survival is shown. Representative data from 1 experiment is shown (n = 5). Log-  
 53 rank Mantel-Cox test compared tritherapy groups to antibody therapy.

54  
 55  
 56  
 57  
 58  
 59  
 60  
 61  
 62  
 63  
 64  
 65

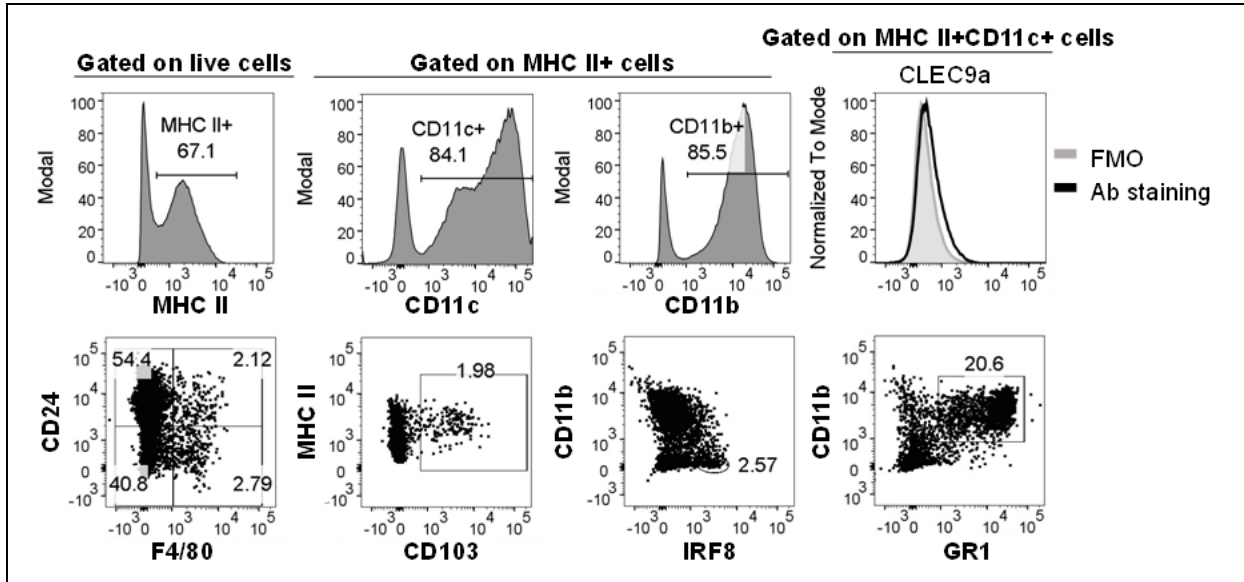

66 **Figure S2. Flow cytometry analysis of DRibbles-pulsed BMCs before vaccination.** A, Bone  
 67 marrow cells were harvested and cultured in complete media for 8 days. On day 8, the resulting  
 68 BMCs were harvested and pulsed with DRibbles for 4.5 h at 37°C, 5% CO<sub>2</sub>. The cells were  
 69 washed by centrifugation and analyzed by flow cytometry. Representative data from 2  
 70 independent experiments are shown.

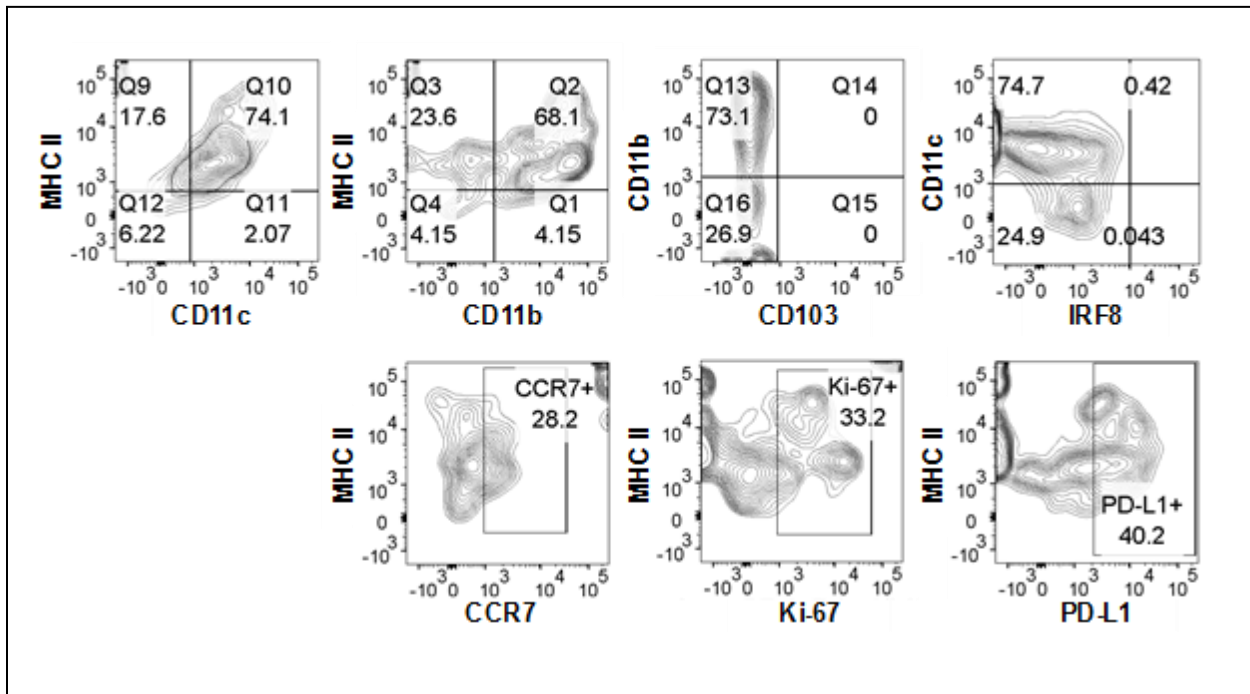

71 **Figure S3. Flow cytometry analysis of peritumorally injected BMCs in tumors of**  
 72 **tritherapy-treated mice 7 days after peritumoral BMC administration.** Line-1 tumor  
 73 bearing mice were treated with the tritherapy. DR-pulsed BMCs were labeled with PKH67  
 74 before p.t. administration. Seven days after p.t. PKH67-labeled BMC administration, tumors  
 75 were harvested and PKH67+ cells were assessed by flow cytometry. The data plots on the top  
 76 row are representative data from 2 independent experiments and the bottom row plots are  
 77 representative data from 1 experiment (n = 4).

78  
 79  
 80  
 81  
 82  
 83  
 84

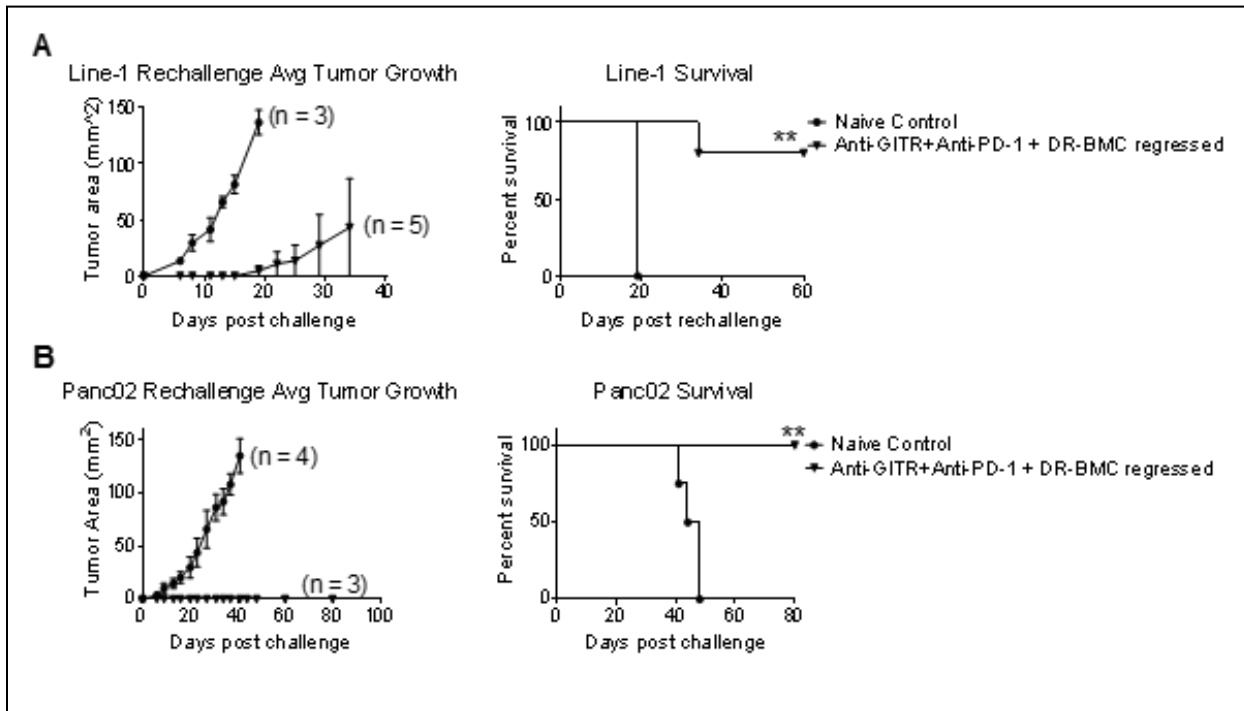

85 **Figure S4. Tritherapy cured mice are protected from tumor rechallenge.** **A**, Line-1 tumor-  
 86 bearing mice which exhibited fully regressed tumors after tritherapy were rechallenged with  
 87 Line-1 tumor cells on the opposite flank. Average tumor growth and survival was assessed. Data  
 88 shown here is representative of one experiment. **B**, Panc02 tumor-bearing mice which exhibited  
 89 fully regressed tumors after tritherapy were rechallenged with Panc02 tumor cells on the  
 90 opposite flank. Average tumor growth and survival was assessed. Data shown here is  
 91 representative of one experiment.

92  
 93  
 94  
 95  
 96  
 97

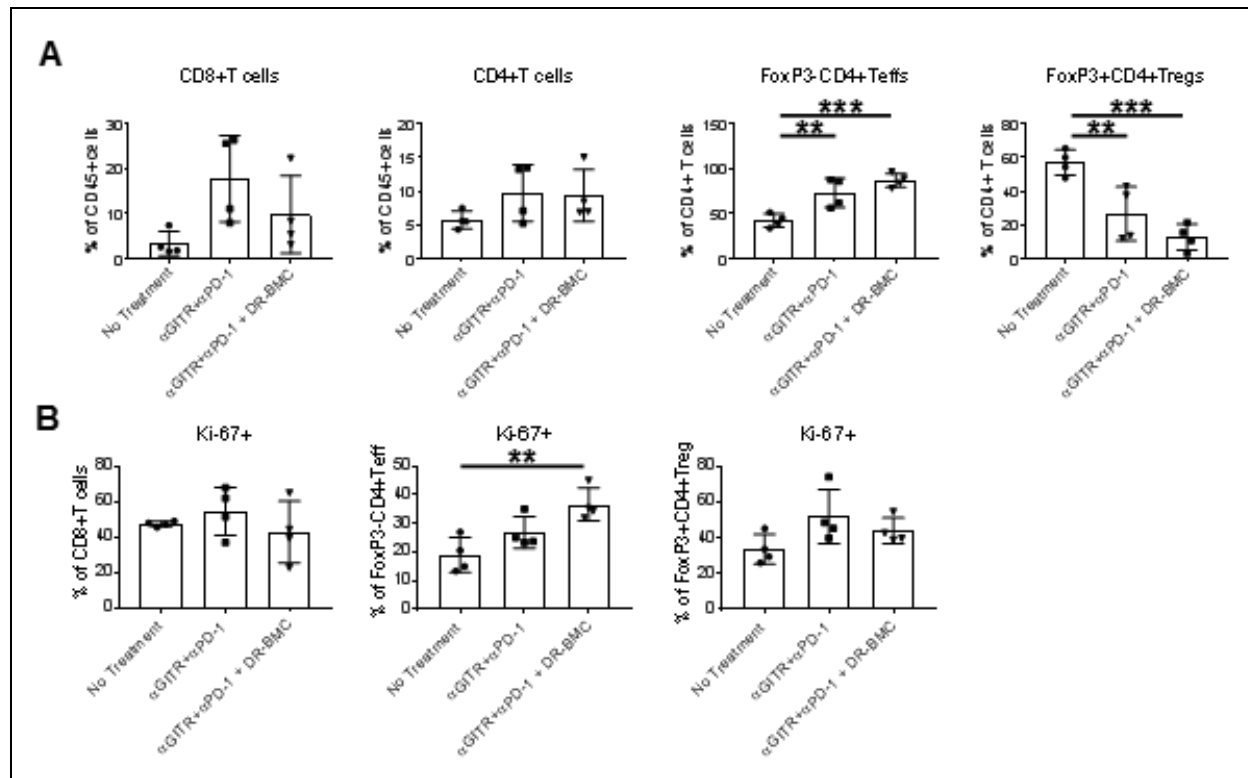

98

99 **Figure S5. Tritherapy alters the tumor CD4+ T-cell compartment in the Panc02 model. A,**

100 Panc02 tumors were harvested 7 days after peritumoral BMC administration and assessed by

101 flow cytometry for tumor-infiltrating T-cells. Data shown is mean  $\pm$  SD of one experiment with

102 n = 4. **B,** Panc02 tumors were harvested from Panc02-tumor-bearing mice 7 days after p.t. BMC

103 vaccination and Ki-67 expression was assessed by intracellular flow cytometry analysis. Data

104 shown is mean  $\pm$  SD of one experiment with n = 4. **A-B** One-Way ANOVA.

105

106

107

108

109

110



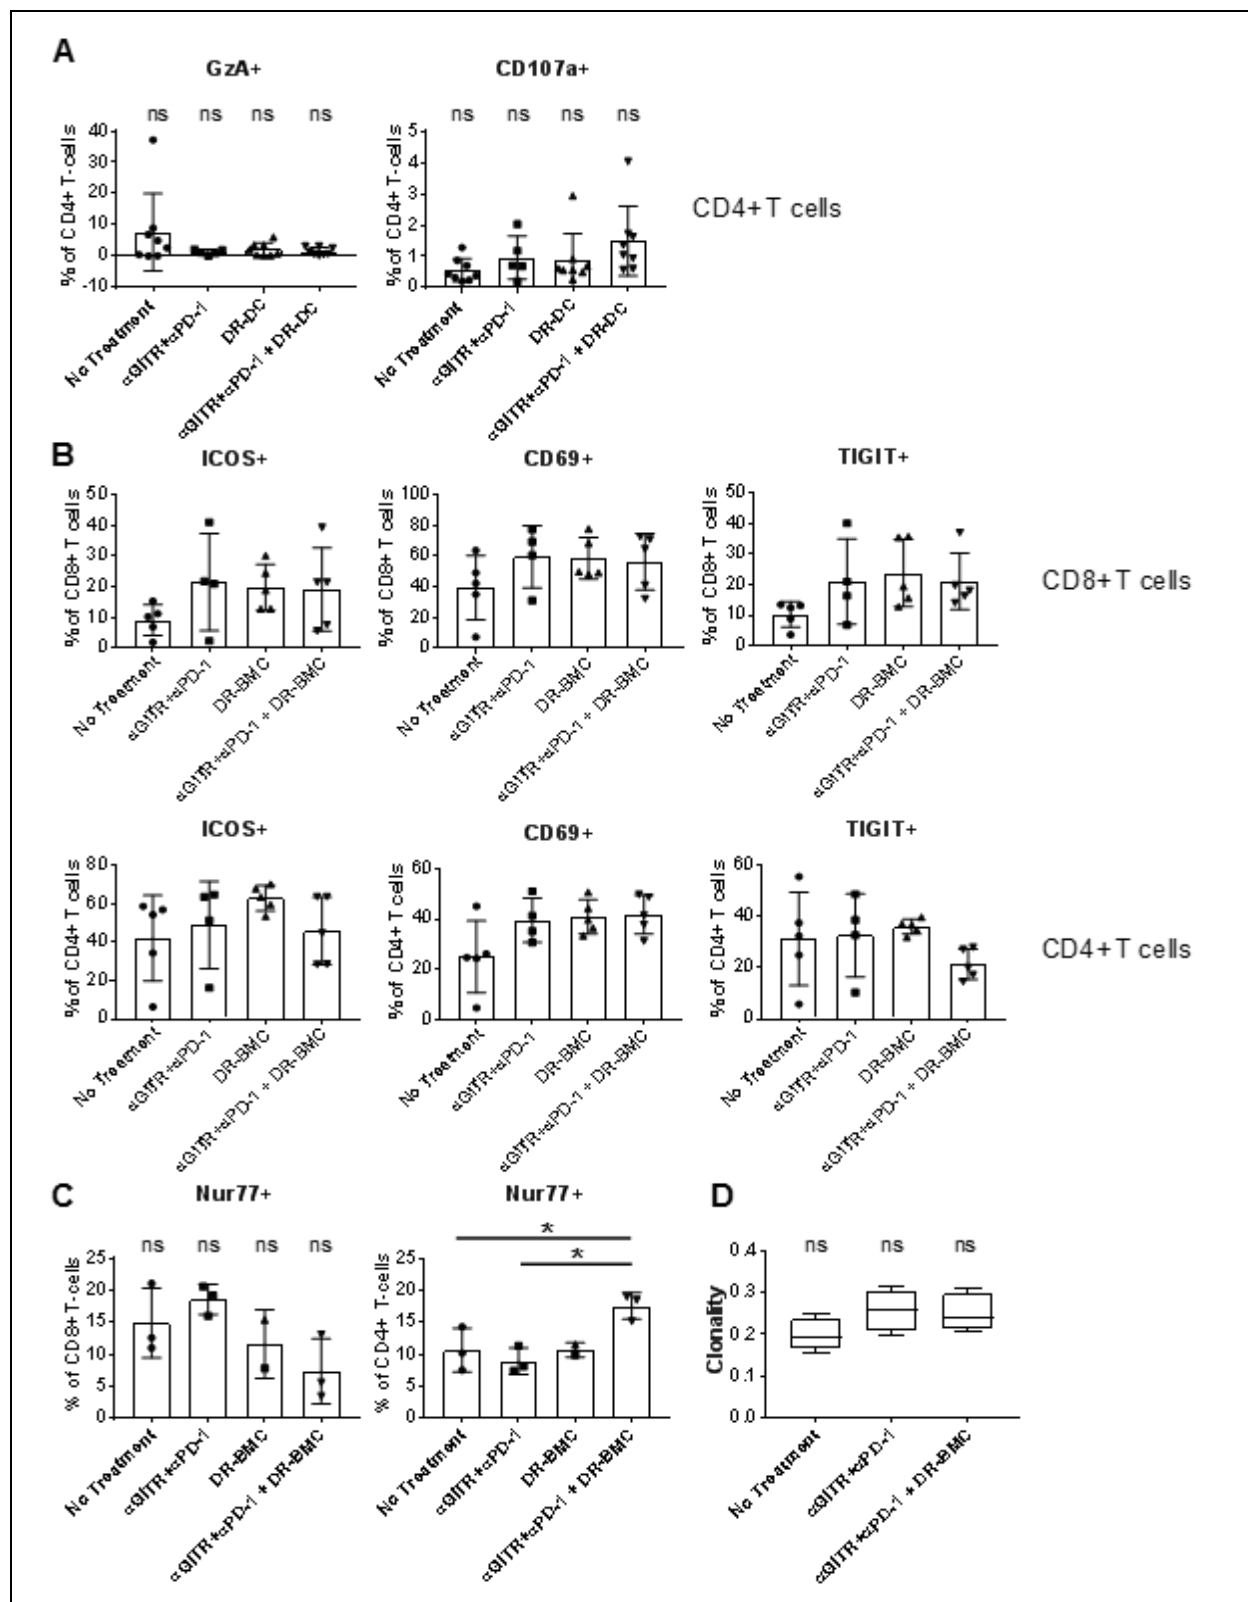

111 **Figure S6. Similar activation marker expression but increased tumor-specific CD4+ T cells**  
 112 **in tumors of tritherapy-treated mice. A, Tumors were harvested 7 days after p.t. DR-BMC**

113 injections and analyzed by flow cytometry for intracellular granzyme A and surface CD107a  
114 expression on CD4+ T cells. Pooled data (mean  $\pm$  SD) from two independent experiments with  
115 n = 4 each is shown here. **B**, Same as **A**, but tumors were analyzed for activation markers.  
116 Shown here is representative data of 4 independent experiments for ICOS expression, 2  
117 independent experiments for CD69 expression and one experiment for TIGIT expression. **C**,  
118 Line-1 tumors were harvested from BALB/c Nur77GFP mice, 3-5 days after p.t. DR-BMC  
119 injections and analyzed by flow cytometry for GFP expression. Shown here is representative  
120 data of 3 independent experiments. **D**, Line-1 tumors were harvested 6 days after p.t. DR-BMC  
121 injections. Genomic DNA was extracted and TCR $\beta$  sequencing was performed. One-Way  
122 ANOVA.

123

124

125

126

127

128

129

130

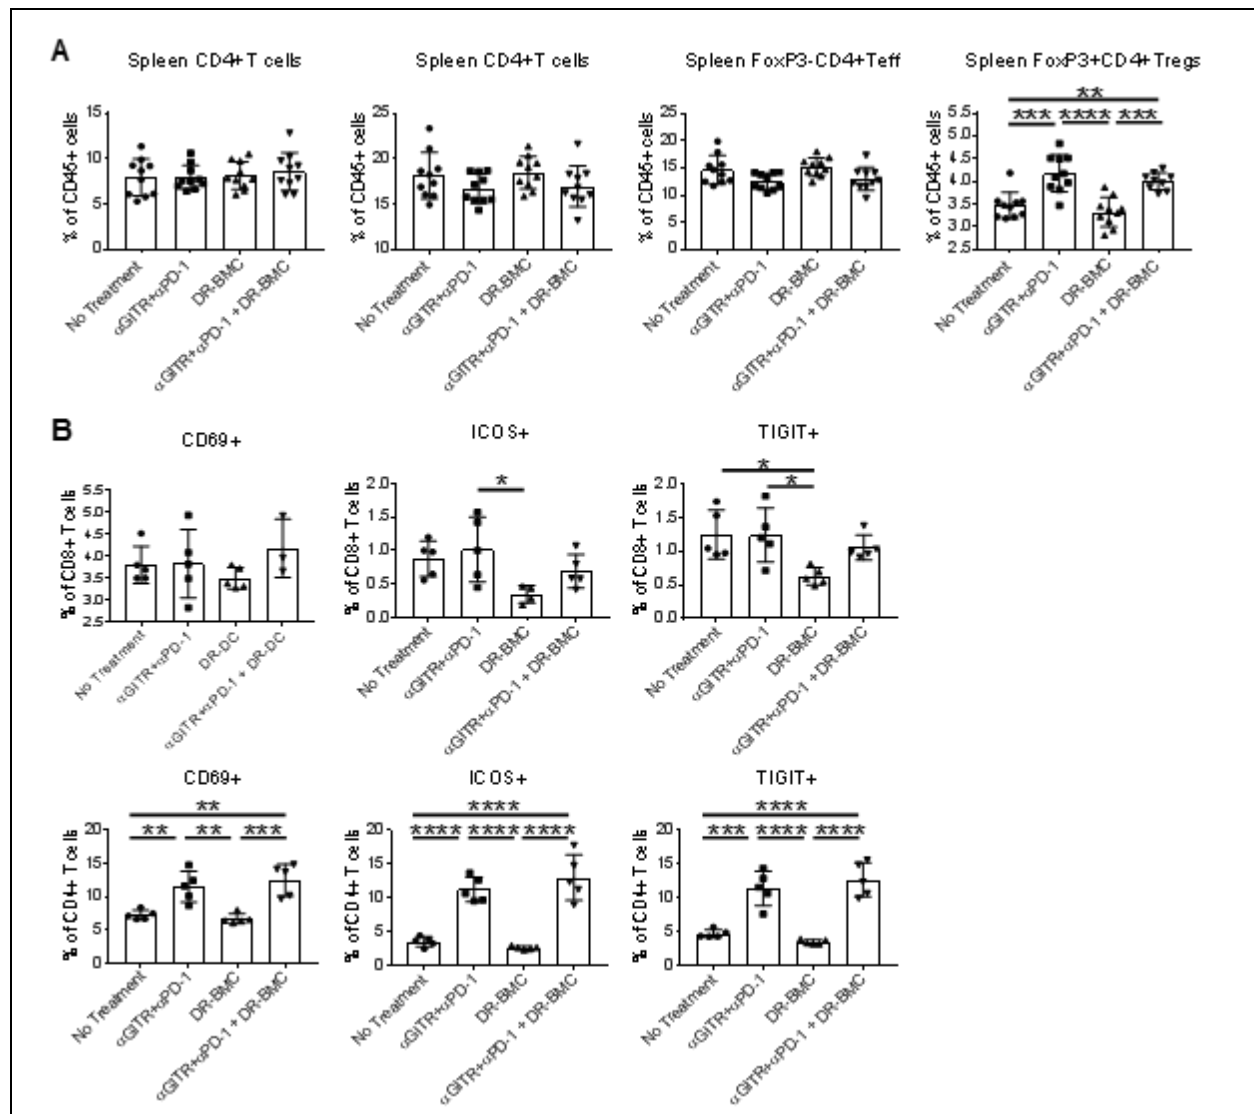

131 **Figure S7. Antibody therapy alters peripheral CD4+T cells.** **A**, 7 days after p.t. DR-BMC  
 132 injections, spleens were harvested and analyzed by flow cytometry. Pooled data from 2  
 133 independent experiments are shown here. **B**, Same as **A** but spleens were analyzed by flow  
 134 cytometry for activation markers on CD8+ T cells (top) and CD4+ T cells (bottom). Shown here  
 135 is representative data of 4 independent experiments for ICOS expression, 2 independent  
 136 experiments for CD69 expression and one experiment for TIGIT expression. **A-B** One-Way  
 137 ANOVA.

138

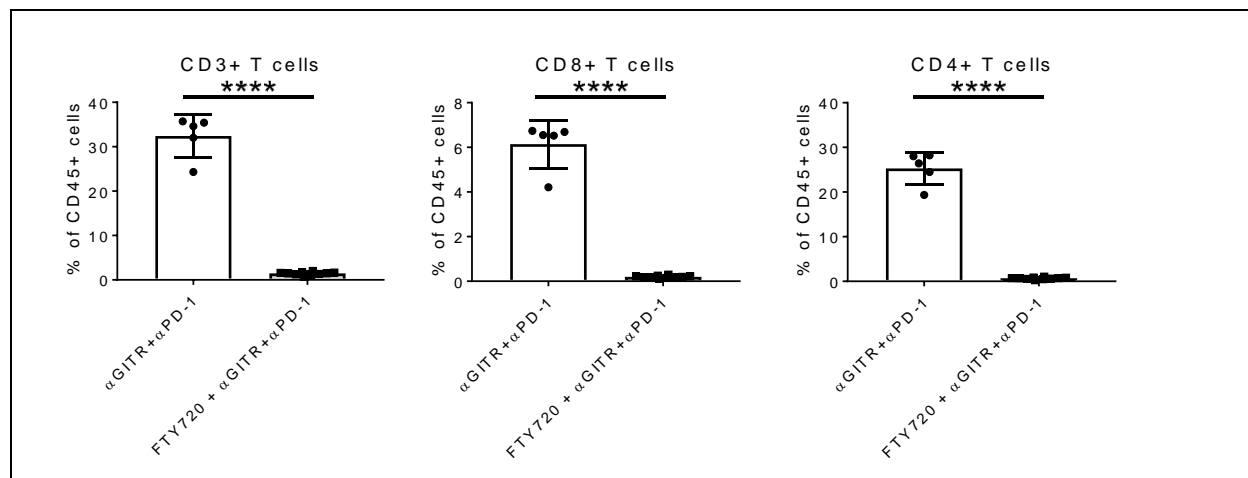

139 **Figure S8. FTY720 decreases circulation of T cells in the blood.** Blood from mice treated  
 140 with antibody therapy with or without FTY720 was assessed for T cells by flow cytometry  
 141 analysis on the 5<sup>th</sup> day of FTY720 administration. Representative data from 4 independent  
 142 experiments are shown. Student's t-test.

143  
 144  
 145  
 146  
 147  
 148  
 149  
 150  
 151  
 152  
 153  
 154  
 155

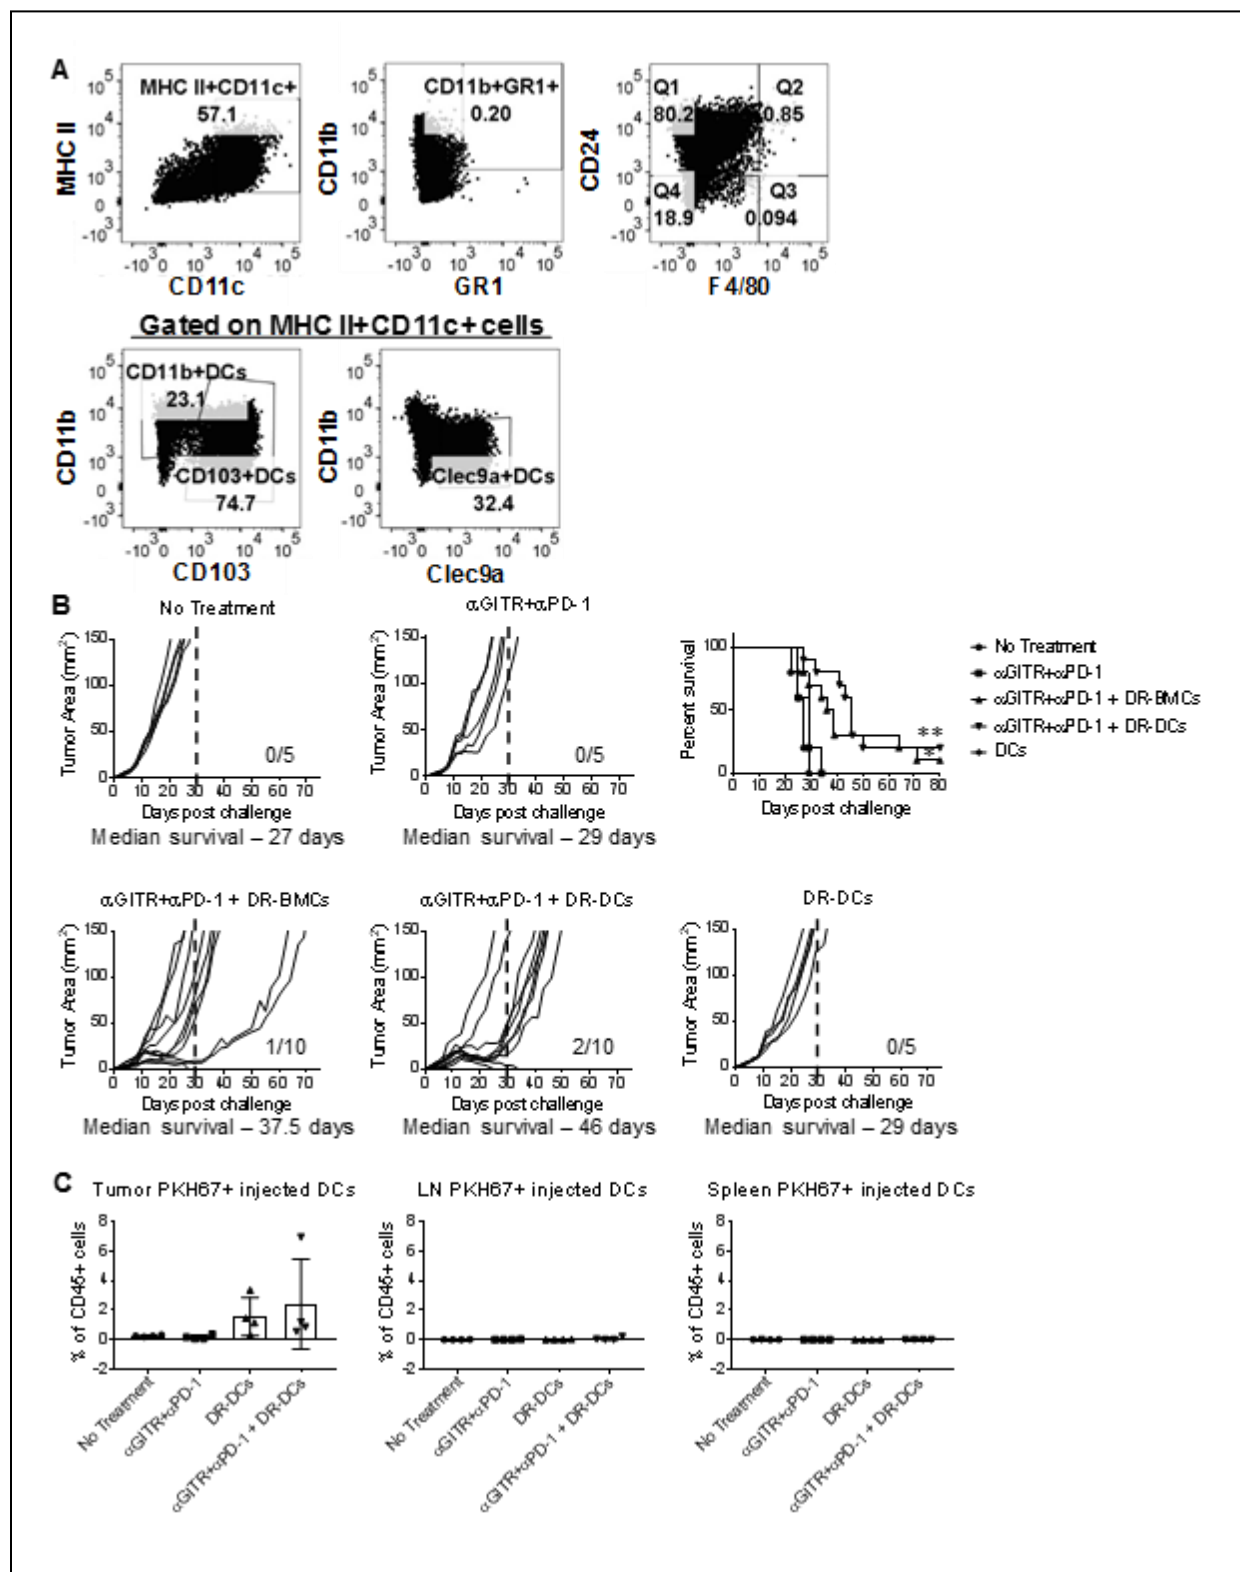

156 **Figure S9. DC-tritotherapy similarly delays tumor growth. A,** Day 15 dendritic cells were  
 157 harvested and pulsed with DRibbles for 4.5 h at 37°C, 5% CO<sub>2</sub>. The cells were washed by

158 centrifugation and analyzed by flow cytometry. Representative data from 3 independent  
159 experiments are shown. **B**, Mice were inoculated with  $2 \times 10^5$  Line-1 cells s.c. on day 0 followed  
160 by 200  $\mu\text{g}$  of anti-GITR Ab on day 4 and 7, and 200  $\mu\text{g}$  of anti-PD-1 Ab on day 9, 11 and 13.  
161 Mice were peritumorally injected with  $2 \times 10^6$  DR-pulsed BMCs or DR-pulsed DCs on day 11.  
162 Individual tumor growth curves and overall survival are shown. Representative data from 2  
163 independent experiments are shown. Log-rank Mantel-Cox test compared BMC-tritherapy or  
164 DC-tritherapy to antibody therapy. **C**, PKH67-labeled cells in the tumor, LN or spleen of mice 7  
165 days after peritumoral injection of PKH67-labeled DCs. Representative data (mean  $\pm$  SD) with n  
166 = 4 from one independent experiment is shown.

167

168

169
